# Supplementary material for: Effects of bovine serum albumin on light activated antimicrobial surfaces
Source: Royal Society of Chemistry journal article supplement (doi:10.1039/c8ra04361b), 2018-01-01

## Supporting Material

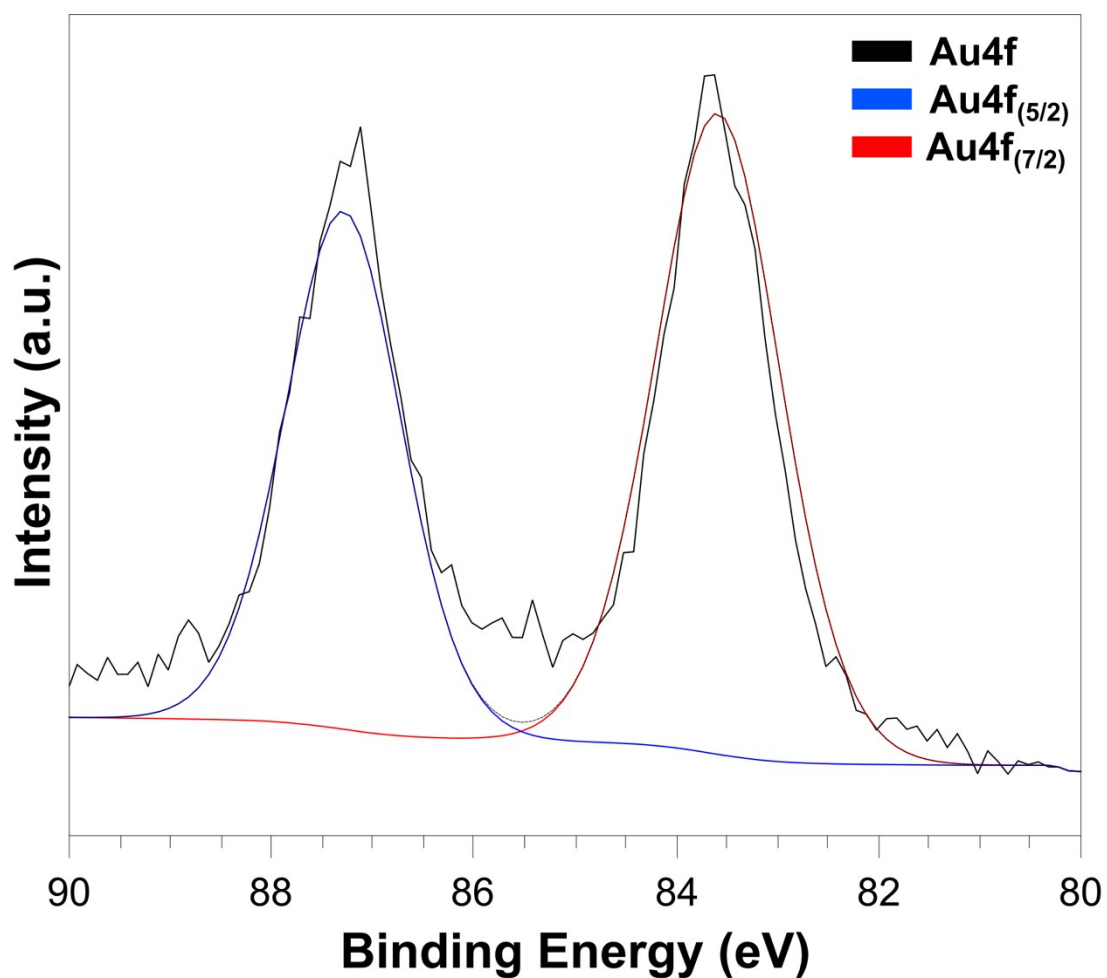

Figure 1S: XPS of AuNPs after swell encapsulation into polyurethane. The Au4f peaks confirm the presence of AuNPs into the polymer.

# Antimicrobial Testing Methods Illustration

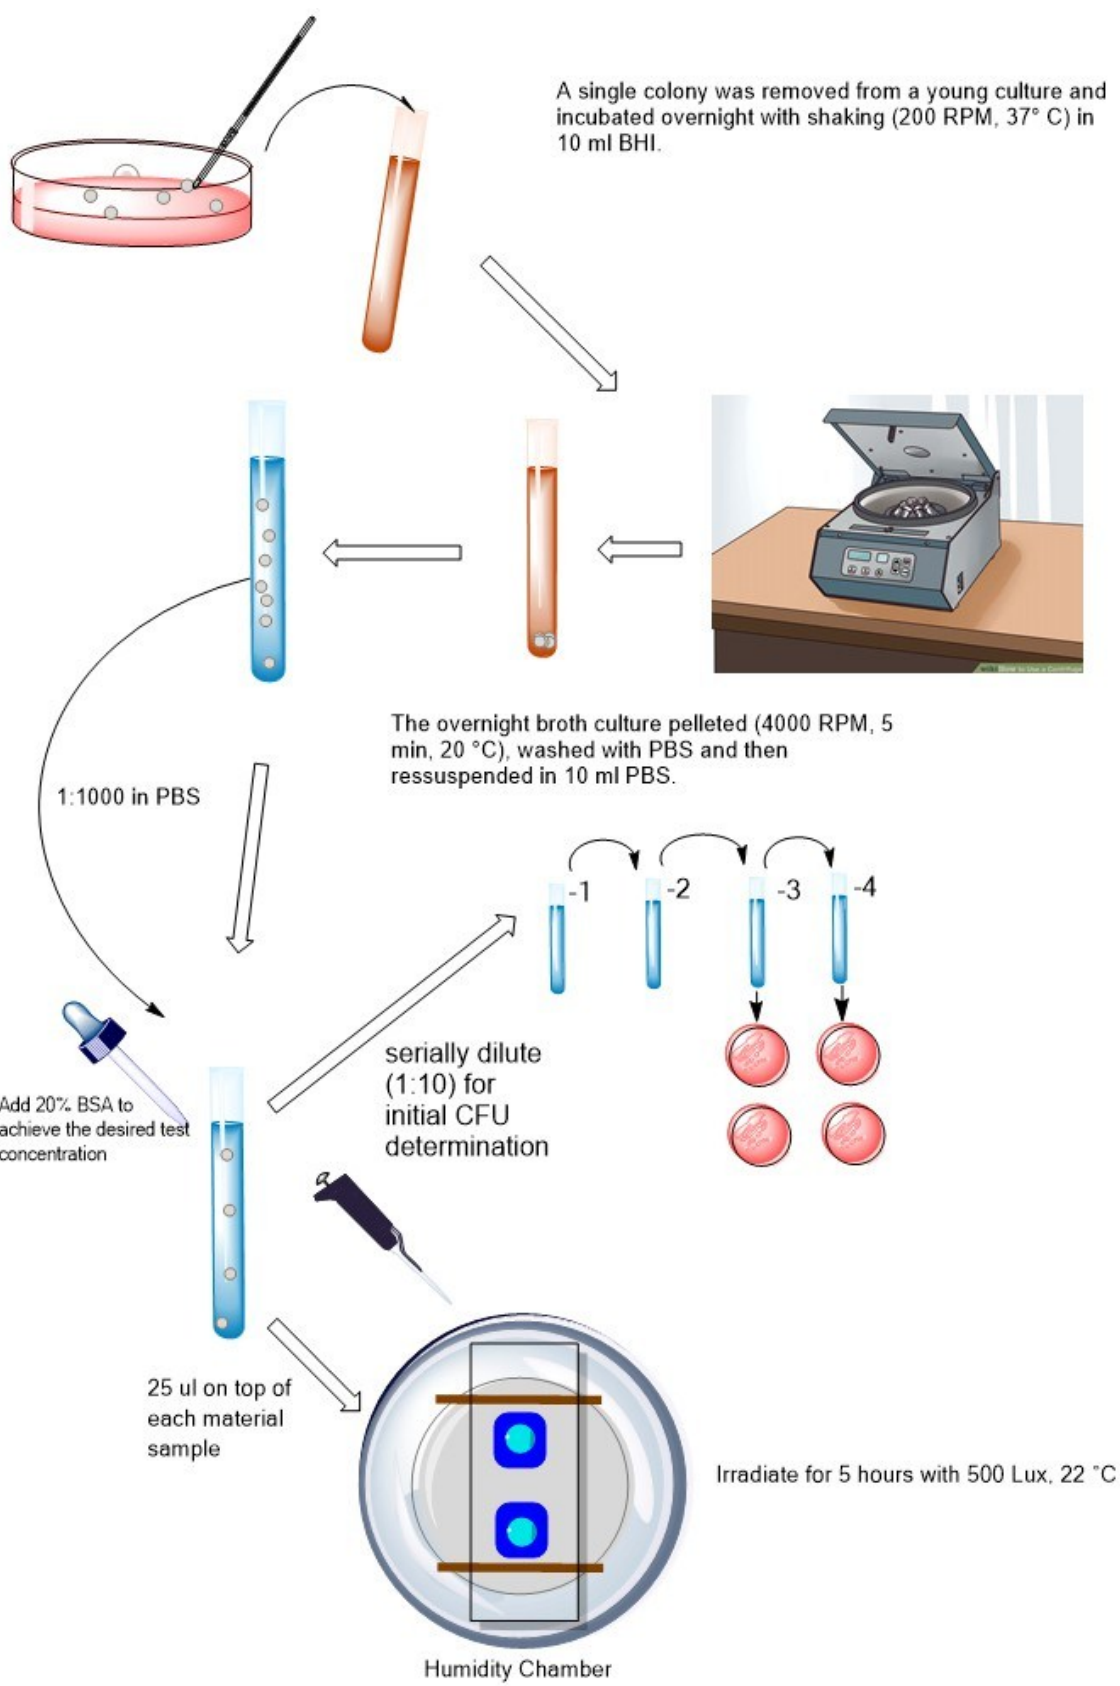

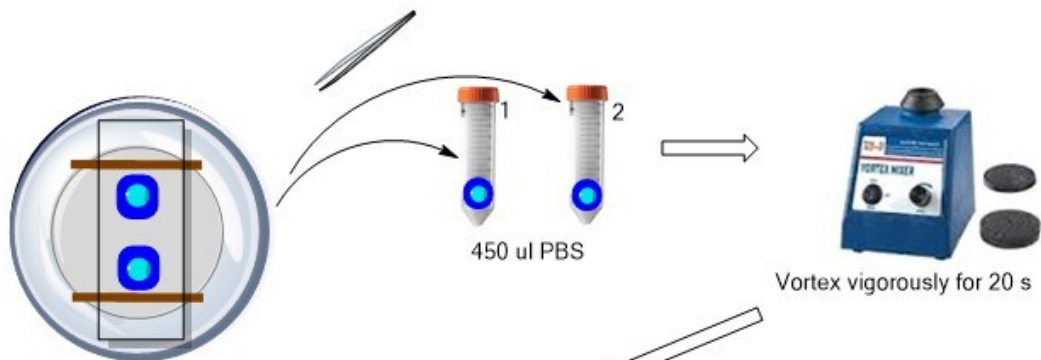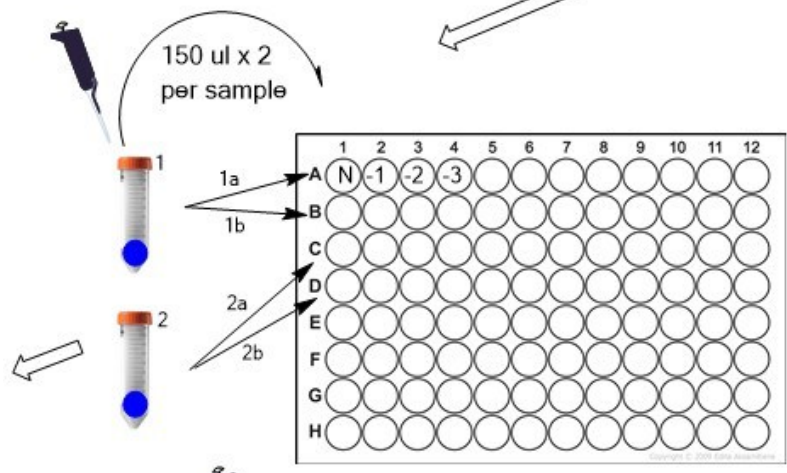

The schematic above was followed for all the tested samples. The numbers on row A represent the serial dilutions N=neat, -1= $10^{-1}$  and so on. For the serial dilutions 20 ul were diluted in 180 ul of PBS.

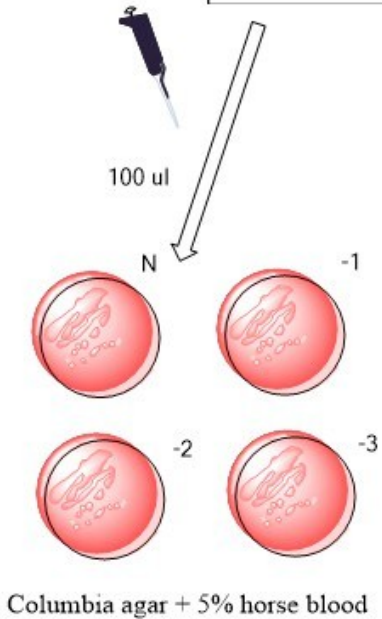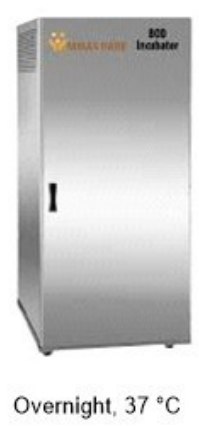

Supplement: c8ra04361b1.pdf [file c8ra04361b1.pdf]
